# Supplementary material for: Fast and slow dynamics and the local structure of liquid and supercooled water next to a hydrophobic amino acid
Source: Royal Society of Chemistry journal article supplement (doi:10.1039/c6cp04532d), 2016-01-01
Supplement: c6cp04532d1.pdf [file c6cp04532d1.pdf]

# **Fast and Slow Dynamics and Local Structure of Liquid and Supercooled Water next to a Hydrophobic Amino Acid**

*Supporting Information*

H. F. M. C. Martiniano<sup>a</sup>, N. Galamba<sup>b,\*</sup>

<sup>a</sup> BioSystems & Integrative Sciences Institute, Faculdade de Ciências da Universidade de Lisboa, Campo Grande, 1749-016, Lisboa, Portugal.

<sup>b</sup> Centro de Química e Bioquímica, Faculdade de Ciências da Universidade de Lisboa, Edifício C8, Campo Grande, 1749-016 Lisboa, Portugal.

---

\* Author to whom all correspondence should be addressed. Electronic mail: njgalamba@fc.ul.pt

## Tables

Table 1 – Density and mean number of waters for the different water populations.

| $T/K$ | $\rho/g \cdot cm^{-3}$ | $N_{Bulk}$  | $N_{HSh}$  | $N_{4WN}$  | $N_{L4WN}$ |
|-------|------------------------|-------------|------------|------------|------------|
| 234   | 0.9872                 | 233.7±0.2   | 22.7±0.1   | 12.0±0.1   | 10.7±0.1   |
| 249   | 1.001                  | 232.5±0.2   | 22.7±0.1   | 11.7±0.1   | 11.05±0.09 |
| 261   | 1.003                  | 232.47±0.07 | 22.55±0.09 | 11.34±0.07 | 11.21±0.07 |
| 271   | 1.004                  | 232.6±0.1   | 22.34±0.09 | 11.1±0.07  | 11.2±0.1   |
| 286   | 1.002                  | 233.12±0.04 | 22.10±0.05 | 10.70±0.03 | 11.40±0.04 |
| 301   | 0.9982                 | 233.86±0.04 | 21.79±0.03 | 10.36±0.09 | 11.4±0.1   |
| 328   | 0.9883                 | 235.44±0.04 | 21.22±0.08 | 9.72±0.07  | 11.5±0.1   |
| 365   | 0.9615                 | 239.38±0.09 | 20.22±0.06 | 8.86±0.05  | 11.35±0.02 |

## Figures

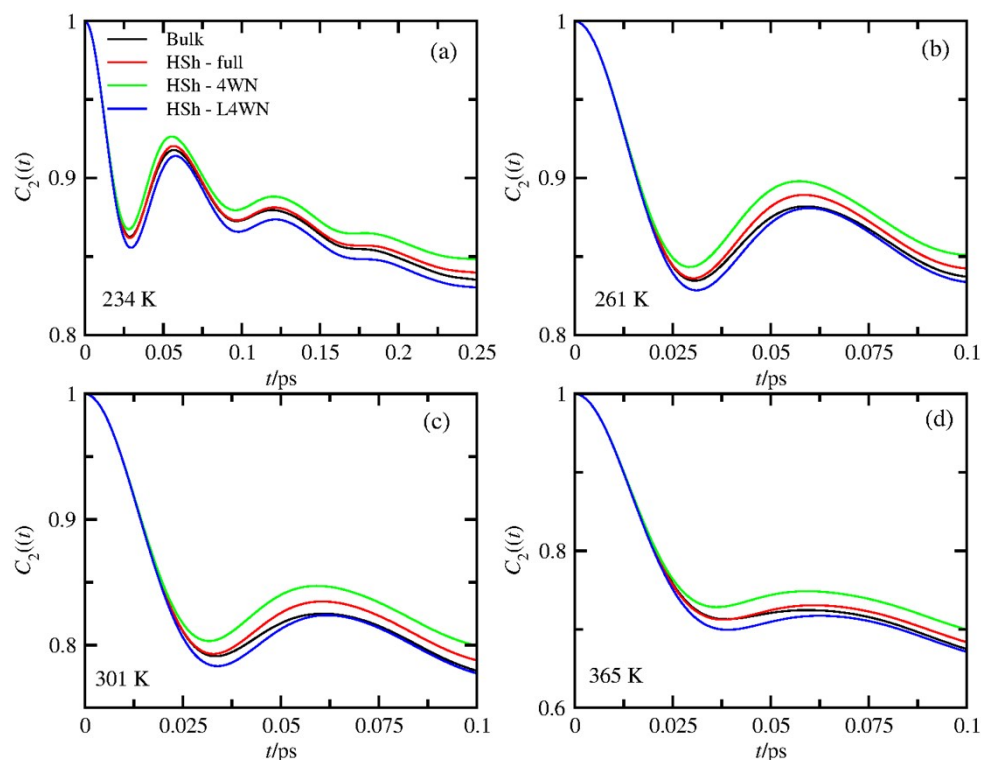

Figure 1-SI – Orientational time correlation functions at short times for four different temperatures. The plots show that the librational dynamics of waters with L4WN in the Val ( $C_\beta$ ) hydration shell (HSh) is faster than in bulk water, opposite to waters with 4WN.

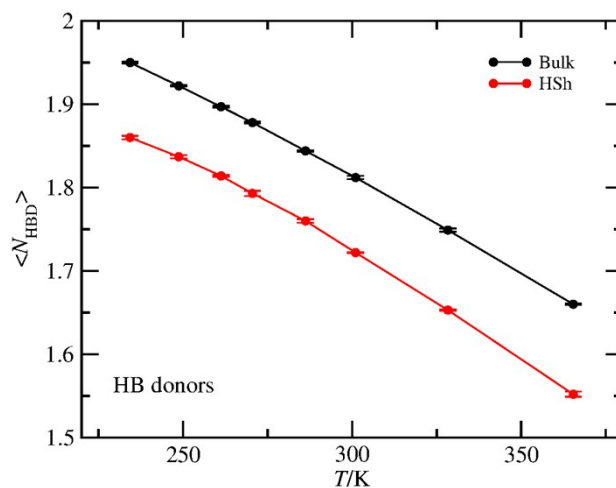

Figure 2-SI – Mean number of HB donors in the bulk and in Val ( $C_\beta$ ) hydration shell (HSh).

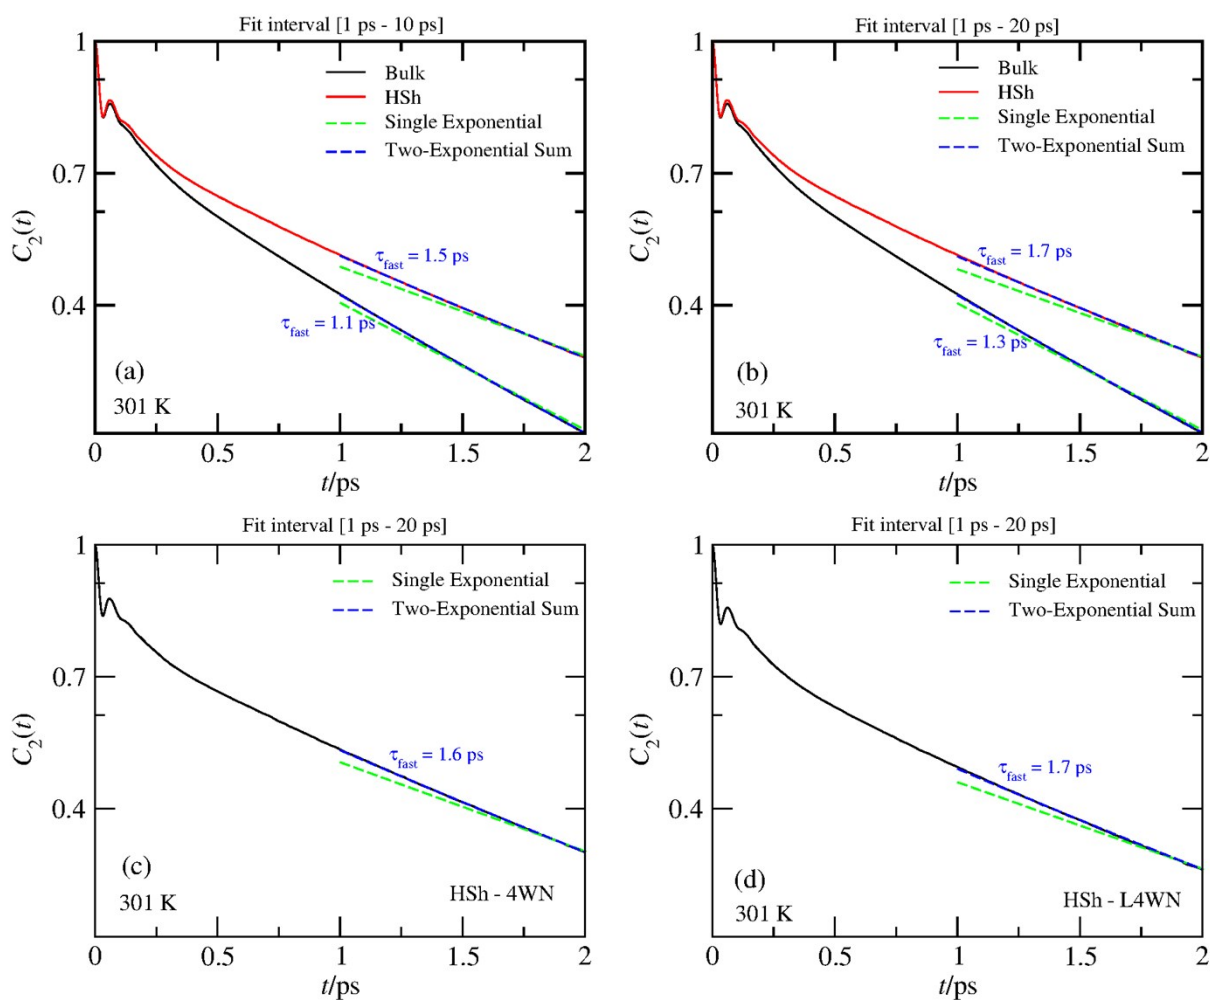

Figure 3-SI – Single and two-exponential sum fits of the OTCFs at short times for bulk and shell water, (a) and (b), and for 4WN (c) and L4WN (d) shell water populations. Deviations from a single exponential at short times can be observed for bulk and shell water while a good fit is observed with a two-exponential sum for every population.

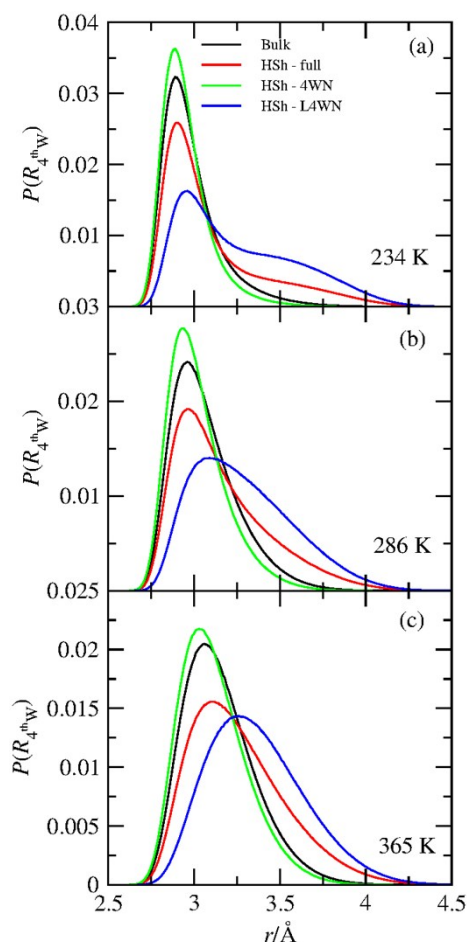

Figure 4-SI – Distribution of the fourth nearest water neighbor at three distinct temperatures. A narrowing and a shift of the distributions to lower distances can be observed at every temperature for the 4WN population. The fraction of neighbors at  $r \leq 3.5$  Å in the bulk, hydration shell (HSh), HSh-4WN, and HSh-L4WN are respectively: 234 K (98%, 88%, 99%, and 75%); 286 K (97%, 88%, 99%, and 78%) and 365 K (94%, 82%, 96%, and 74%).

Fig. 4-SI shows that  $\sim 75\%$  of the waters with L4WN have a fourth water neighbor in the first hydration layer ( $r \leq 3.5$  Å), although at a distance larger than the nearest atom of Val. We note that if instead of the solute heavy atoms the fourth water is considered, an even lower tetrahedrality is found. Thus, the proximity to the solute induces a distortion of the tetrahedral geometry.
